# Supplementary material for: e14a2 Transcript Favors Treatment-Free Remission in Chronic Myeloid Leukemia When Associated with Longer Treatment with Tyrosine Kinase Inhibitors and Sustained Deep Molecular Response
Source: MDPI journal article supplement (doi:10.3390/jcm13030779), 2024-01-29
Supplement: s1 [file s1]

**Table S1.** Demographic and baseline clinical characteristics of the IM study series.

|                                                   |                                 | <b>e13a2<br/>(n=86)</b> | <b>e14a2<br/>(n=138)</b> | <b>Total<br/>(n=224)</b> | <b><i>p</i> value</b> |
|---------------------------------------------------|---------------------------------|-------------------------|--------------------------|--------------------------|-----------------------|
| <b>Sex (male/total) (%)</b>                       |                                 | 42/86 (48.8)            | 71/138 (51.4)            | 113/224 (50.4)           | 0.808                 |
| <b>Age, median (min, max)</b>                     |                                 | 54 (15, 83)             | 56 (12, 84)              | 55 (12, 84)              | 0.164                 |
| <b>SplenomegalyP, median cm<br/>(min, max)</b>    |                                 | 0 (0, 20)               | 0 (0, 30)                | 0 (0, 30)                | 0.260                 |
| <b>Platelets (x10e9/L), median<br/>(min, max)</b> |                                 | 312 (37, 2240)          | 382 (1, 1870)            | 362 (1, 2240)            | 0.016                 |
| <b>Blasts PB (%), median (min,<br/>max)</b>       |                                 | 0 (0, 11.0)             | 0 (0, 11.0)              | 0 (0, 11.0)              | 0.548                 |
| <b>Cytogenetics,<br/>n (%)</b>                    | <b>t(9;22) (%)</b>              | 67/74 (90.5)            | 110/127 (86.6)           | 177/224 (88.1)           | 0.547                 |
|                                                   | <b>t(9;22) +<br/>others (%)</b> | 7/74 (9.5)              | 17/127 (13.4)            | 24/224 (11.9)            |                       |
| <b>Sokal, n (%)</b>                               | <b>Low risk (%)</b>             | 48/85 (56.5)            | 50/132 (37.9)            | 98/224 (45.2)            | 0.027                 |
|                                                   | <b>Int risk (%)</b>             | 28/85 (32.9)            | 61/132 (46.2)            | 89/224 (41.0)            |                       |
|                                                   | <b>High risk<br/>(%)</b>        | 9/85(10.6)              | 21/132 (15.9)            | 30/224 (13.8)            |                       |
| <b>ELTS, n (%)</b>                                | <b>Low risk (%)</b>             | 53/85(62.4)             | 70/132 (53.0)            | 123/224 (56.7)           | 0.267                 |
|                                                   | <b>Int risk (%)</b>             | 26/85 (30.6)            | 45/132 (34.1)            | 71/224 (32.7)            |                       |
|                                                   | <b>High risk<br/>(%)</b>        | 6/85 (7.1)              | 17/132 (12.9)            | 23/224 (10.6)            |                       |
